# Supplementary material for: Amphiphilicity-Controlled Localization of Red Emitting Bicationic Fluorophores in Tumor Cells Acting as Bio-Probes and Anticancer Drugs
Source: MDPI journal article supplement (doi:10.3390/molecules27123713), 2022-06-09
Supplement: s1 [file s1]

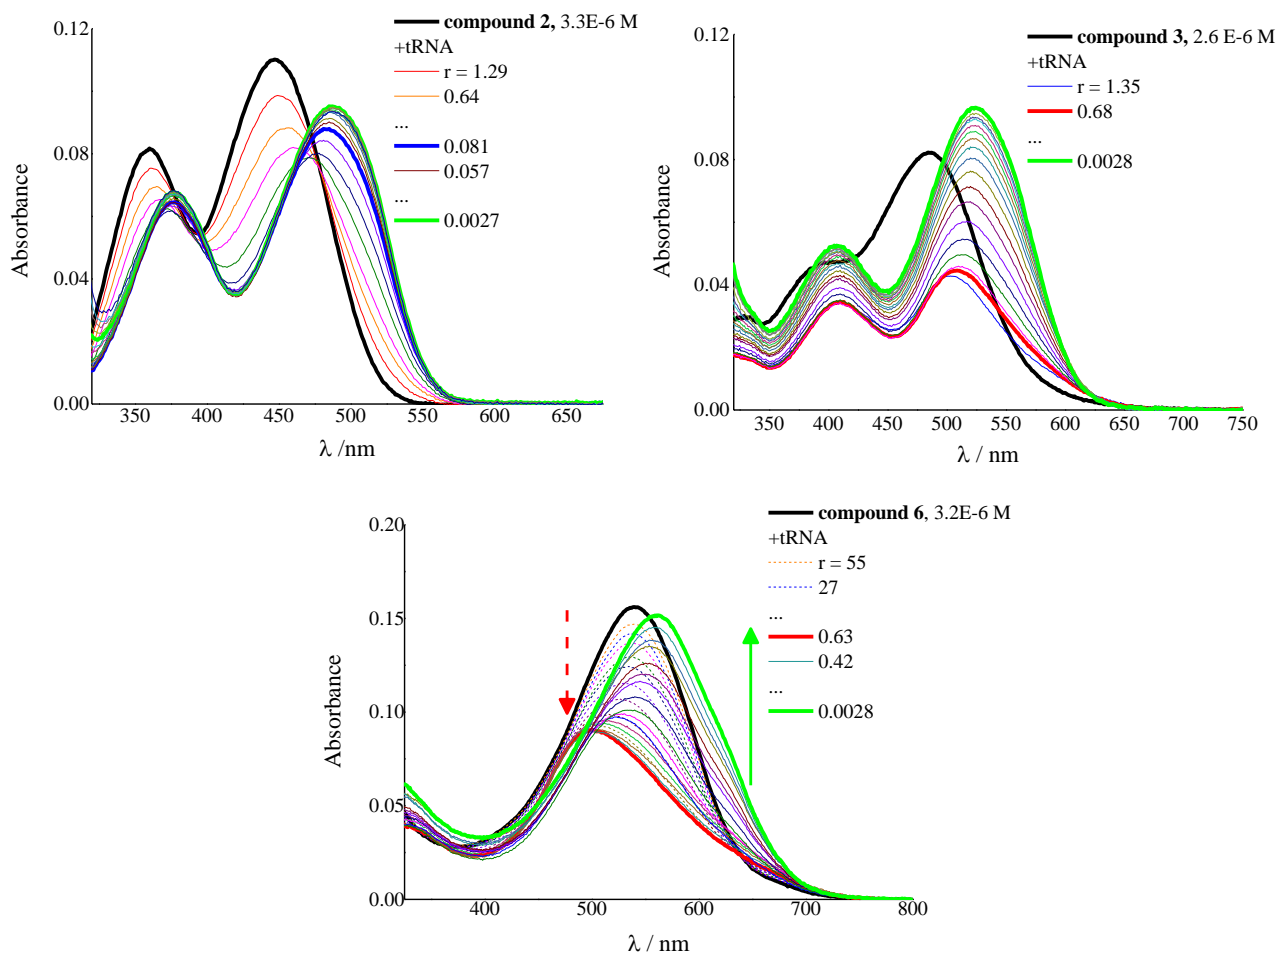

**Figure S1.** Changes in the absorption spectrum of **2** ( $c = 3.3 \mu\text{M}$ ), **3** ( $c = 2.6 \mu\text{M}$ ) and **6** ( $c = 3.2 \mu\text{M}$ ) in ETN buffer solution, pH 7.4, upon titration with tRNA.

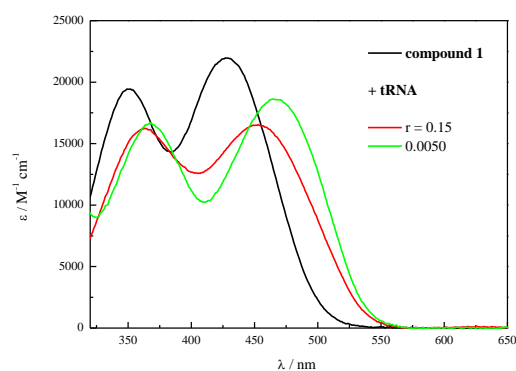

**Figure S2.** Quantitative absorption spectra of **1** and its complexes with tRNA in ETN buffer solution, pH 7.4.

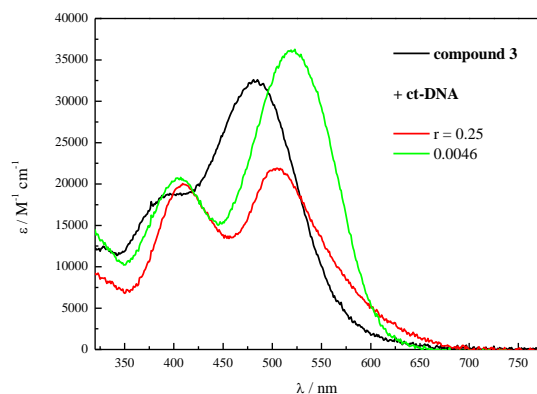

**Figure S3.** Quantitative absorption spectra of **3** and its complexes with ct-DNA in ETN buffer solution, pH 7.4.

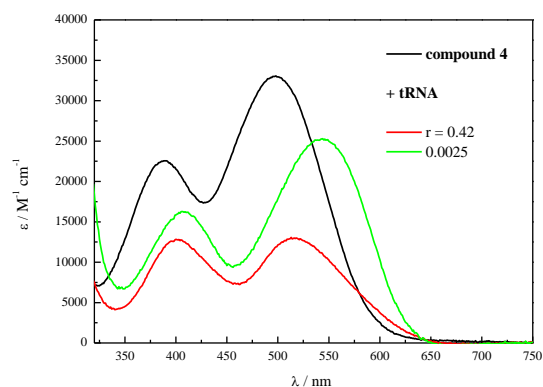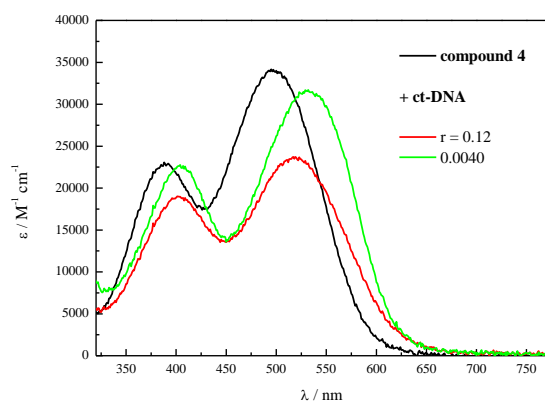

**Figure S4.** Quantitative absorption spectra of **4** and its complexes with tRNA (LEFT) and ct-DNA (RIGHT) in ETN buffer solution, pH 7.4.

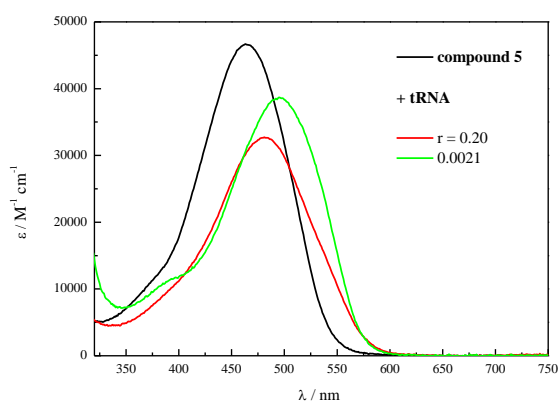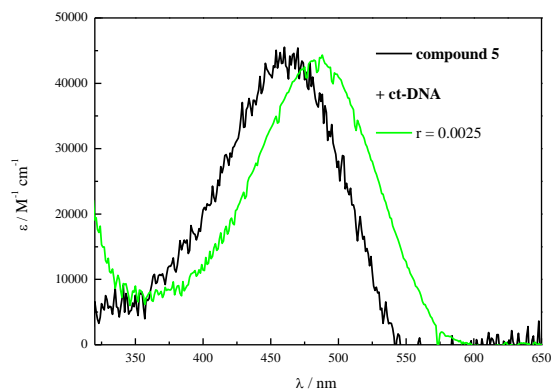

**Figure S5.** Quantitative absorption spectra of **5** and its complexes with tRNA (LEFT) and ct-DNA (RIGHT) in ETN buffer solution, pH 7.4.

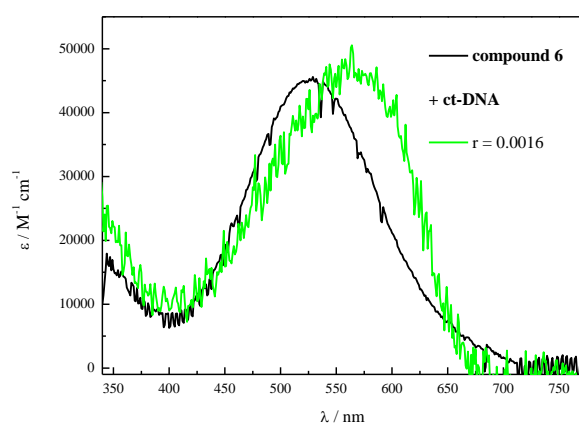

**Figure S6.** Quantitative absorption spectra of **6** and its complexes with ct-DNA in ETN buffer solution, pH 7.4.

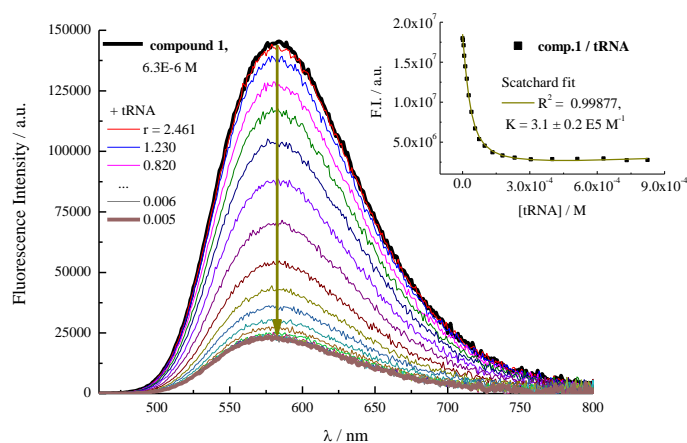

**Figure S7.** Changes in the fluorescence spectrum of **1** ( $\lambda_{\text{exc}} = 430$  nm,  $c = 6.3$   $\mu\text{M}$ ) in ETN buffer solution, pH 7.4, upon titration with tRNA; Inset: fluorescence intensity of **1** as a function of tRNA concentration and its fitting according to the Scatchard equation ( $n = 0.2$ ).

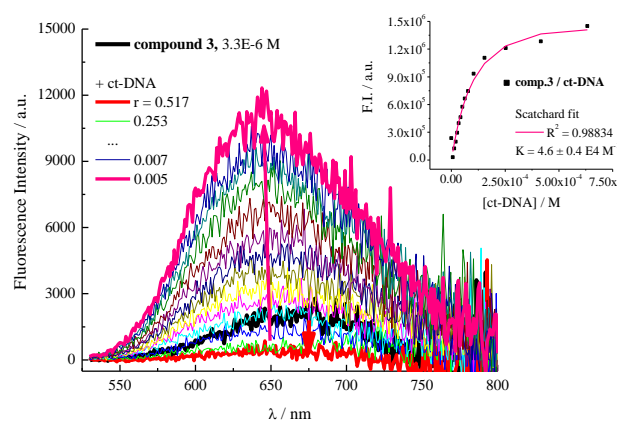

**Figure S8.** Changes in the fluorescence spectrum of **3** ( $\lambda_{\text{exc}} = 500$  nm,  $c = 3.3$   $\mu\text{M}$ ) in ETN buffer solution, pH 7.4, upon titration with ct-DNA; Inset: fluorescence intensity of **3** as a function of ct-DNA concentration and its fitting according to the Scatchard equation ( $n = 0.2$ ).

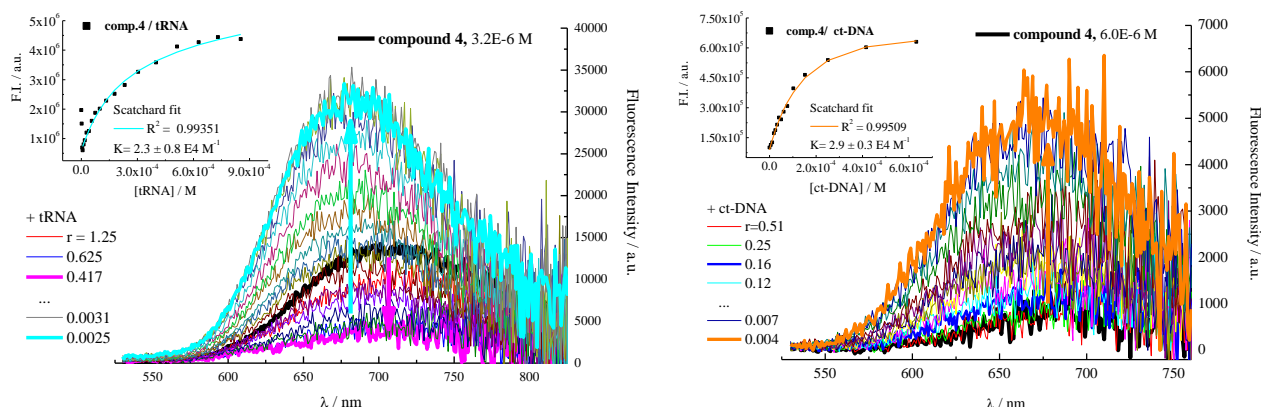

**Figure S9.** Changes in the fluorescence spectrum of 4 in ETN buffer solution, pH 7.4, upon titration with tRNA (Left,  $\lambda_{\text{exc}} = 500 \text{ nm}$ ,  $c = 3.2 \mu\text{M}$ ) and ct-DNA (Right,  $\lambda_{\text{exc}} = 500 \text{ nm}$ ,  $c = 6.0 \mu\text{M}$ ); Insets: fluorescence intensities of 4 as a function of tRNA and ct-DNA concentration and their fitting according to the Scatchard equation ( $n = 0.2$ ).

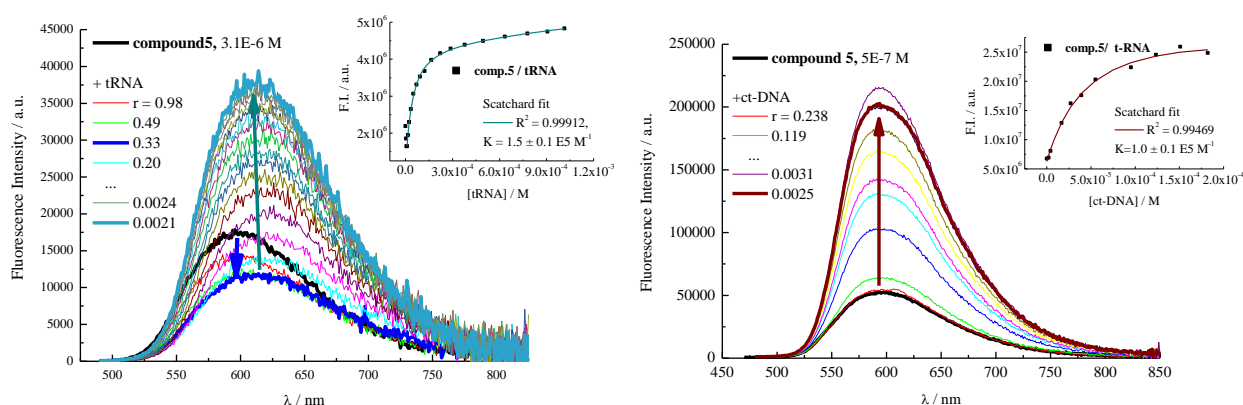

**Figure S10.** Changes in the fluorescence spectrum of 5 in ETN buffer solution, pH 7.4, upon titration with tRNA (Left,  $\lambda_{\text{exc}} = 465 \text{ nm}$ ,  $c = 3.1 \mu\text{M}$ ) and ct-DNA (Right,  $\lambda_{\text{exc}} = 468 \text{ nm}$ ,  $c = 0.5 \mu\text{M}$ ); Insets: fluorescence intensities of 5 as a function of tRNA and ct-DNA concentration and their fitting according to the Scatchard equation ( $n = 0.2$ ).

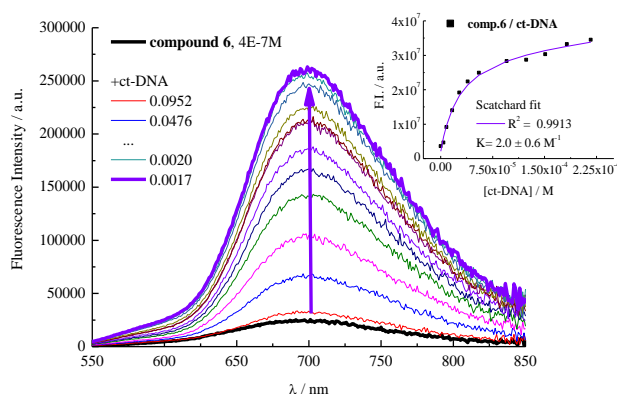

**Figure S11.** Changes in the fluorescence spectrum of 6 ( $\lambda_{\text{exc}} = 522 \text{ nm}$ ,  $c = 0.4 \mu\text{M}$ ) in ETN buffer solution, pH 7.4, upon titration with ct-DNA; Inset: fluorescence intensity of 6 as a function of ct-DNA concentration and its fitting according to the Scatchard equation ( $n = 0.2$ ).



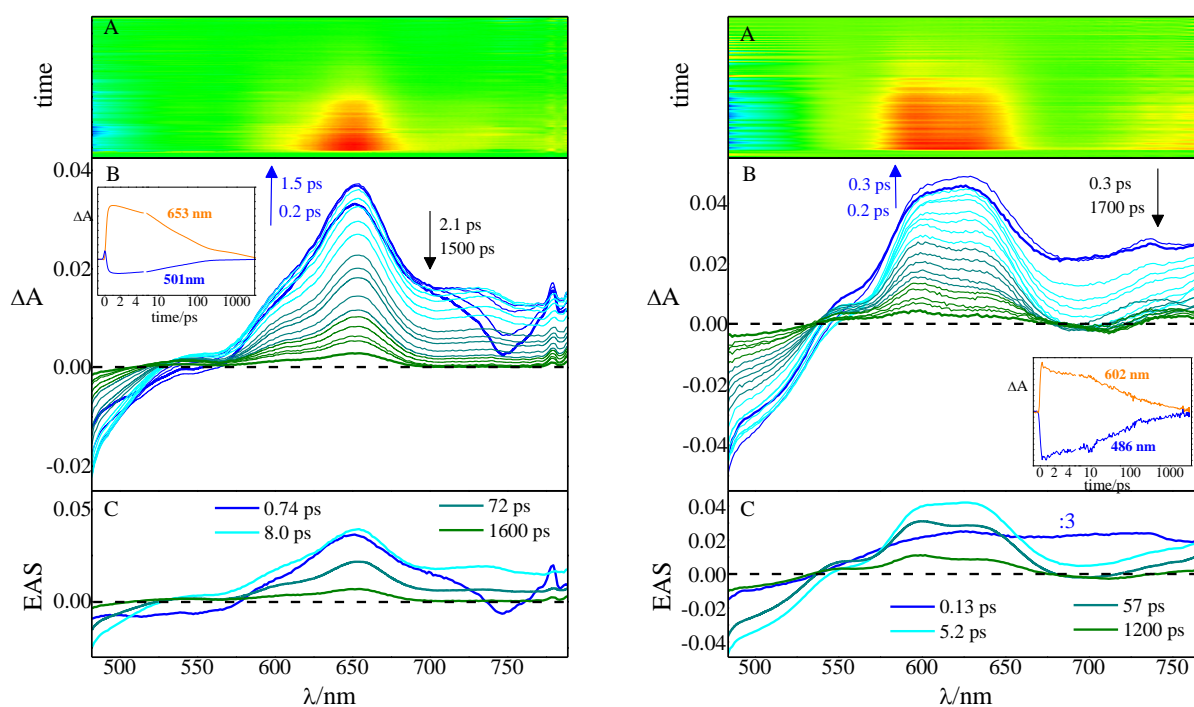

**Figure S12.** Pump-probe absorption spectroscopy of compounds **1** (Left graph) and **2** (Right graph) in ETN buffer solution, pH 7.4, complexed with tRNA, r ([compound]/[tRNA]) = 0.005 ( $\lambda_{\text{exc}} = 400$  nm): (A) contour plot of the experimental data, (B) time-resolved absorption spectra recorded at different delays after the laser pulse (inset: decay kinetics recorded at meaningful wavelengths), and (C) Evolution Associated Spectra (EAS) obtained by global analysis.

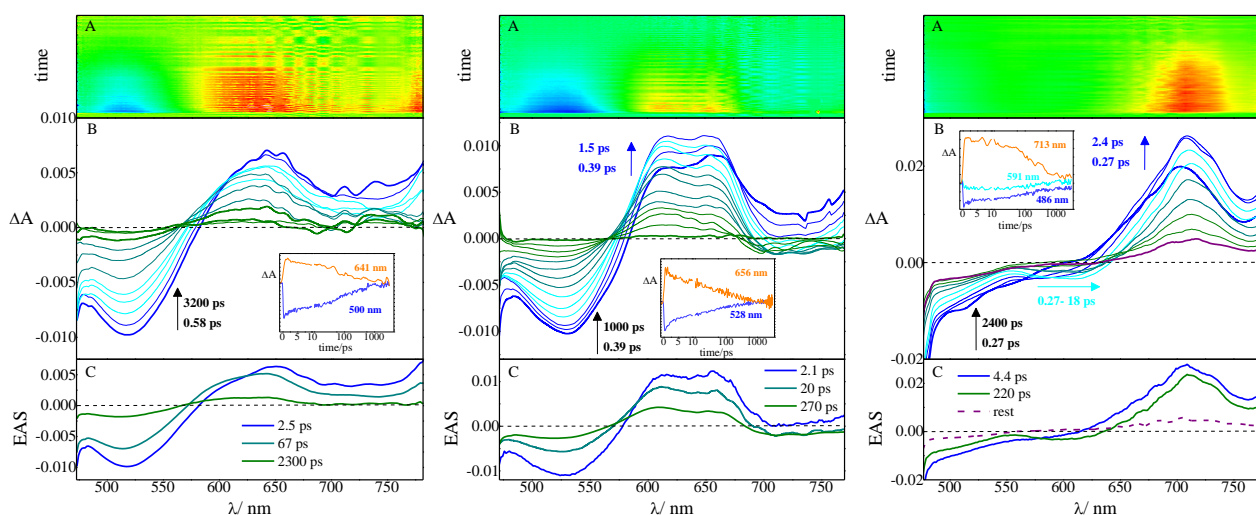

**Figure S13.** Pump-probe absorption spectroscopy of compounds **3** (Left graph), **4** (Central graph), and **5** (Right graph) in ETN buffer solution, pH 7.4, complexed with ct-DNA, r ([compound]/[ct-DNA]) = 0.005 ( $\lambda_{\text{exc}} = 400$  nm): (A) contour plot of the experimental data, (B) time-resolved absorption spectra recorded at

different delays after the laser pulse (inset: decay kinetics recorded at meaningful wavelengths), and (C) Evolution Associated Spectra (EAS) obtained by global analysis.

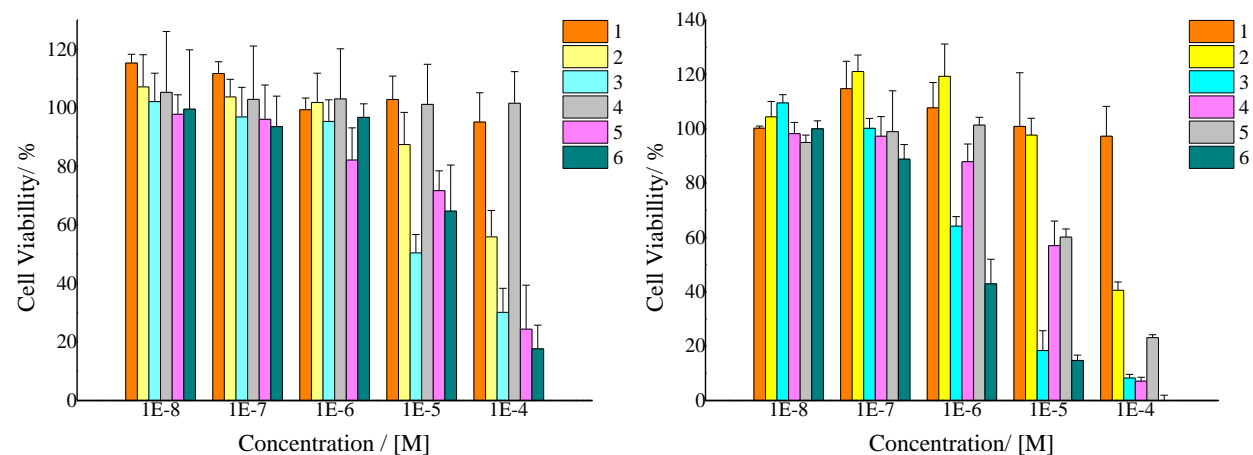

**Figure S14.** Antiproliferative effect exerted by compounds 1-6 on A549 (Left) and HeLa (Right) cell lines, expressed as mean of two independent experiments of four replicas each  $\pm$  SD.

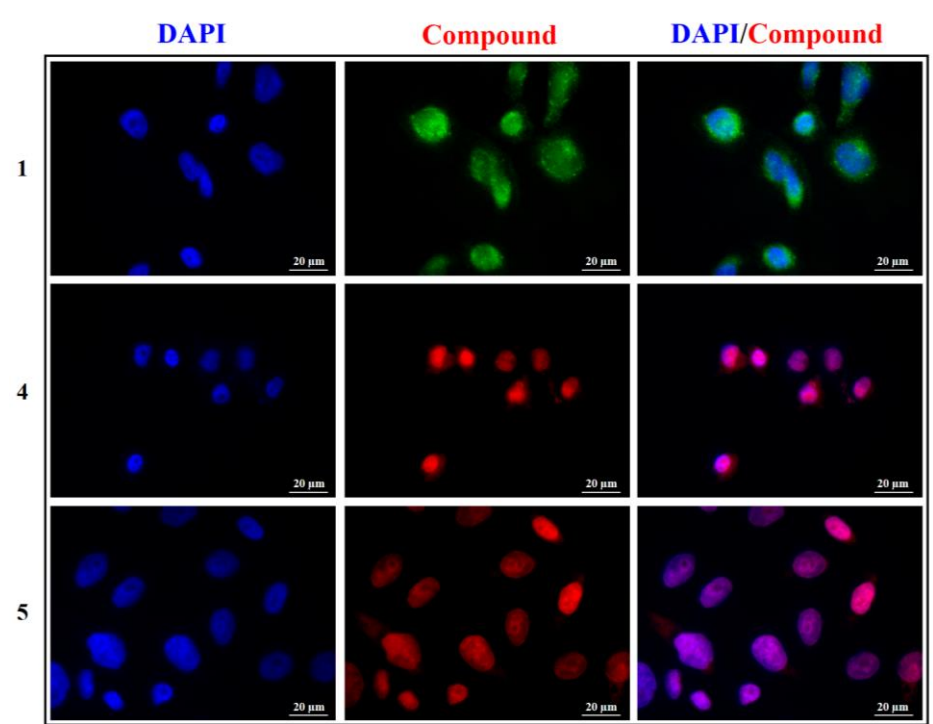

**Figure S15.** Representative fluorescence microscopy images of nuclei (DAPI, blue), compound 1 (green), and compounds 4 and 5 (red), and the relative merged images of HeLa cells. Image magnification: 60  $\times$ .

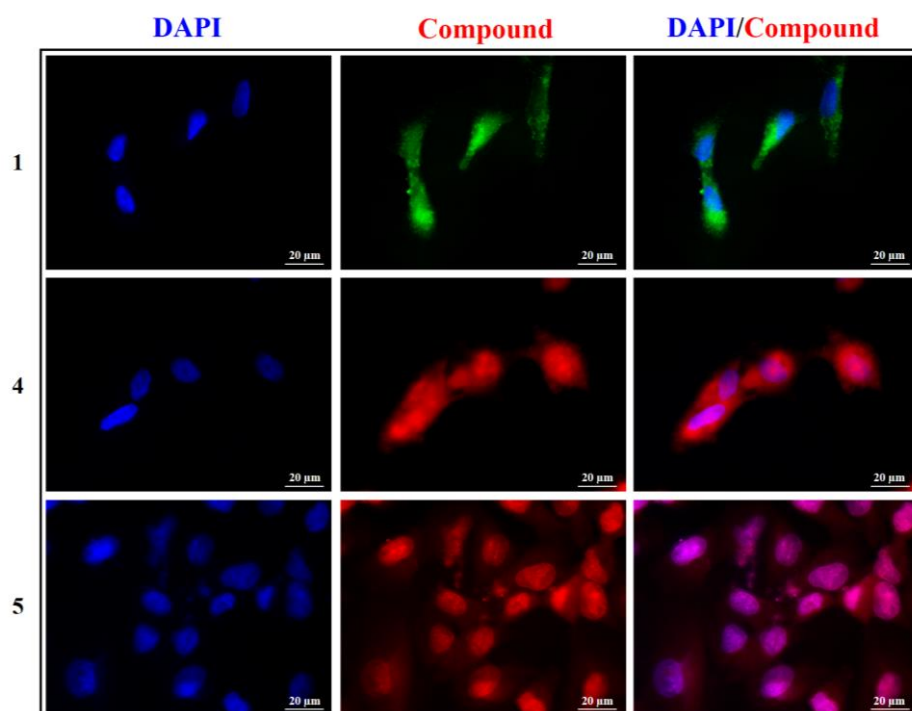

**Figure S16.** Representative fluorescence microscopy images of nuclei (DAPI, blue), compound **1** (green), and compounds **4** and **5** (red), and the relative merged images of A549 cells. Image magnification: 60 ×.

**Table S1.** cLogP (consensus LogP) descriptor of compounds **1-6** calculated using the SwissADME web tool.

| Compounds | 1    | 2    | 3    | 4    | 5    | 6    |
|-----------|------|------|------|------|------|------|
| cLogP     | 3.33 | 3.35 | 4.91 | 3.50 | 4.69 | 4.86 |
